# Supplementary material
Source: HighWire-hosted journal article supplement (https://www.cmajopen.ca/highwire/filestream/81377/field_highwire_adjunct_files/3/2019-0111-original-submission.pdf)
Supplement: 2019-0111-original-submission.pdf [file 2019-0111-original-submission.pdf]

## 1 INTRODUCTION

2 BC has the highest proportion of medically assisted deaths in Canada (1). In rural areas, access  
3 to MAiD is inadequate (2-4); even in larger cities, access to a MAiD assessor can be difficult if a  
4 request is time-sensitive. To qualify for MAiD, patients must be “in an advanced state of decline  
5 in capacity” and their “natural death has become reasonably foreseeable”; they are rarely in a  
6 condition to travel for health care (5). Since November 2018, The Medical Assistance in Dying  
7 Travel and Training Assistance Program (MAiDTAP) compensates MAiD assessors and providers  
8 requiring travelling for MAiD for rural communities (6), but not for urban or suburban areas. In  
9 BC, ‘one of the medical assessors, but not both, may provide their assessment by telemedicine  
10 (TM) provided that, during the TM assessment, another regulated health professional is in  
11 physical attendance with the patient to act as a witness to the assessment’ (7). TM use is  
12 expanding in BC (8); it has been used in many other areas of medicine effectively to help  
13 provide access to care (9-10). To our knowledge, the specific impacts of using TM for MAiD  
14 eligibility assessments on quality of care has not yet been assessed. This research explored  
15 these impacts from the perspective of patients, support persons, assessors and administrators  
16 involved in the MAiD process in BC.

17

## 18 METHODS

19 This study consisted of quantitative information from three health authorities and semi-  
20 structured interviews with patients, support persons, assessors, MAiD coordinators and

1  
2  
3  
4  
5  
6  
7  
8  
9  
10  
11  
12  
13  
14  
15  
16  
17  
18  
19  
20  
21  
22  
23  
24  
25  
26  
27  
28  
29  
30  
31  
32  
33  
34  
35  
36  
37  
38  
39  
40  
41  
42  
43  
44  
45  
46  
47  
48  
49  
50  
51  
52  
53  
54  
55  
56  
57  
58  
59  
60

administrators who were involved with the use of TM for MAiD eligibility assessments in BC.

Research approval was obtained by the UBC Behavioural Research Ethics board (UBC #H15-03198). All interviews were conducted by one researcher (S.D.) by telephone or video meeting (using GoToMeeting) and lasted approximately 30 minutes. SD was a Master’s student at the time and identifies as female. Participants wishing to answer questions via email were also provided with that option. The interviews were audio recorded and transcribed, removing any identifying features. To recruit participants, an invitation letter and a written consent form were sent via email to relevant contacts of a medical clinic providing MAiD services in Vancouver, BC. Participants were told that this project was part of a Master’s degree project and provided verbal (audio-recorded) and/or written consent.

We used the BC Health Quality Matrix (11), a framework providing a common language for defining the quality of care, comprised of seven dimensions of quality (Table 1). Participants were asked to provide insight about these dimensions according to their specific role and perspective. Two researchers from the field reviewed the interview guide and provided feedback to ensure content validity. An iterative process was used for the interview; questions evolved with time and new perspectives and the interview guide was modified accordingly. We used Dedoose to facilitate interview content analysis (12). Quantitative data were analyzed using descriptive statistics and qualitative data were processed using principles of a phenomenology theoretical framework (13). Qualitative data were categorized using the seven dimensions of the BC Health Quality Matrix (14), and then analyzed with inductive coding (by SD). Identified themes were compiled and evaluated in the context of what is already known

about the topic, based on current literature. Three researchers, including the interviewer, were involved in multiple meetings to discuss coding and to reach consensus.

## RESULTS

Out of 24 invitations, 21 participants consented to participate in the research. Eighteen participants agreed to be interviewed while three preferred to provide their answers via email. The interviews were conducted between June and November 2018 and consisted of one interview per participant. Interviewees included:

- Eight MAiD assessors (seven physicians and one nurse practitioner) who used TM for at least one of their MAiD eligibility assessment,
- Seven support persons of patients who had requested MAiD and participated in one eligibility assessments via TM,
- One patient who participated in an eligibility assessment via TM and,
- Five MAiD administrators, who were either involved in coordinating a MAiD eligibility assessment with TM or in charge of the MAiD program for a health authority.

Table 2 presents proportion information for TM eligibility assessments in MAiD since legalization for the three health authorities. Tables 3 to 5 provide demographic data of the participants, while Table 6 provides an overview of the TM perception, expertise and satisfaction and Table 7 presents the types of devices, software and location used.

## Acceptability

1  
2  
3 61 Support persons and the one patient unanimously thought that MAiD eligibility assessment via  
4  
5 62 TM was acceptable. Qualifiers included *'easier', 'convenient', 'natural', 'patient centered',*  
6  
7  
8 63 *'adequate', 'personal', 'helpful', 'fantastic' and 'positive'*. MAiD assessors also expressed  
9  
10 64 positive comments on TM acceptability, despite conveying overall more reservation. For  
11  
12  
13 65 example: *'the ability to touch or the ability to move or see how they are moving is more difficult*  
14  
15 66 *and limited, so empathy is reduced'* (Assessor F). Similarly, another one reported: *'it's not as*  
16  
17 67 *warm and fuzzy as in person but all the in person are not necessarily warm and fuzzy either'*  
18  
19  
20 68 (Assessor G). Several interviewees thought that the context inherent to TM assessments was  
21  
22  
23 69 not as rich or complete: *'with telemedicine, I really just focus in on what their experience is with*  
24  
25 70 *their illness or with their disease and less about them as a person, so I lose that aspect of*  
26  
27 71 *knowing them'* (Assessor F). The administrators who had acted as witnesses felt that their  
28  
29  
30 72 presence added a human touch to the consultation: *'sometimes I have been able to interpret*  
31  
32 73 *what a physician has said on the phone...or also follow up with the patient about some of the*  
33  
34 74 *conversations that happened on the phone'* (Administrator A).

35  
36  
37  
38 75 *I usually sit fairly close to the patient so maybe there's a little bit of a...maybe I'm sort of*  
39  
40 76 *doing that usual piece on behalf of the assessor in regard to sort of, you know, touching*  
41  
42 77 *the patient, especially if they've expressed something really difficult for them or are in*  
43  
44 78 *tears'* (Administrator A).

45  
46  
47  
48  
49 79 **Appropriateness**

50  
51  
52 80 The support persons and the one patient all thought that using TM for MAiD eligibility  
53  
54  
55 81 assessment was appropriate in their case. For most assessors and administrators, the main  
56  
57  
58  
59  
60

82 theme regarding the appropriateness of TM related to specific patient characteristics. *'The*  
 83 *patient needs to be able to use the technology appropriately, to be seen, to be visualized, to be*  
 84 *heard, to make themselves understood'* (Assessor D). *'In somebody who is alert and able*  
 85 *to...very quickly and clearly provide consent, then I think TM is fine'* (Assessor E).

86 *Particularly when people are old and frail, the difficulty that they had was not being able*  
 87 *to hear me well on the other end. Whereas when I'm in front of the other person, I can*  
 88 *lean over to the correct ear that they can hear best out of, or be more expressive in the*  
 89 *body language way, but that's not possible on telemedicine* (Assessor F).

## 90 **Accessibility**

91 Most interviewees thought that TM facilitated access to MAiD assessments for their loved ones  
 92 because of their limited physical capacity: *'I couldn't have gotten him in the car, gotten him into*  
 93 *the ferry and...but that would have been really, really sad to have to do that'* (Support Person  
 94 C). In two instances, support persons believed that having the TM option allowed access to  
 95 MAiD, as their loved ones were not able to travel to obtain an in-person MAiD eligibility  
 96 assessment: *'it was her only way to find a doctor to do this, it was a miracle that Skype was*  
 97 *available, it was wonderful'* (Support Person A). Most assessors described TM as a facilitator for  
 98 MAiD eligibility assessments due to factors such as distance or under-served areas:

99 *I will often, though not always, do the assessment through telemedicine because it*  
 100 *means I spend 2 hours doing the assessment rather than the whole day, which is how*  
 101 *long it would take me to actually go and see the patient* (Assessor C).

1  
2  
3  
4  
5  
6  
7  
8  
9  
10  
11  
12  
13  
14  
15  
16  
17  
18  
19  
20  
21  
22  
23  
24  
25  
26  
27  
28  
29  
30  
31  
32  
33  
34  
35  
36  
37  
38  
39  
40  
41  
42  
43  
44  
45  
46  
47  
48  
49  
50  
51  
52  
53  
54  
55  
56  
57  
58  
59  
60

102 Two coordinators thought that TM increased access in a timely manner for the patients,  
103 highlighting that even in larger population settings, access to in-person MAiD eligibility  
104 assessment was challenging at times.

105 **Effectiveness**

106 The support persons and the one patient all thought that TM was an effective way to conduct  
107 MAiD eligibility assessment, given their circumstances, expressing statements such as: *‘in that*  
108 *situation its whatever works...and it worked’* (Support Person C) and *‘it served the purposed that*  
109 *we were trying to achieve’* (Support Person B). Most providers had similar thoughts, concluding  
110 that they were able to reach their goals despite limitations inherent to TM. *‘It gets the job*  
111 *done...and...at the end it is what it is right’* (Assessor G) and *‘it's less than as good as it can be in*  
112 *person, but still good enough for me to do this work’* (Assessor D). *‘I find it's shorter than with*  
113 *the face-to-face contacts because there aren't as many cues to me to ask about further life*  
114 *issues or questions about knowing that person, so I find it restrictive in that sense’* (Assessor F).  
115 The administrators did not report tracking specific metrics regarding TM assessments for  
116 further evaluation purposes other than identifying that the consultation was conducted via TM  
117 on the assessment record.

118 **Safety**

119 Support persons and the one patient did not express comments or concerns about privacy  
120 during the TM assessment. For the assessors, the recurring themes related to safety in the  
121 context of TM were about privacy and confidentiality, especially when using their own device

122 and software. Three administrators confirmed that their health authority recommended the  
 123 use of a consent form for a telemedicine assessment using a software that is not considered  
 124 secure.

125 Three assessors doubted that the witness requirement had a meaningful impact at preventing  
 126 coercion and felt that having a stranger in the room during the assessment was at times  
 127 intrusive.

128 *I see why it needs to be there so that we can ensure that someone is not under duress,*  
 129 *but I do find it a bit of an invasion of their privacy, so I'm mixed about that requirement.*  
 130 *I'm not sure that it actually helps us decide that there is no duress. I think that if there's*  
 131 *duress, that witness could be part of the whole thing, so I don't know that it actually is*  
 132 *protective. I find it more of an invasion than a protection (Assessor D).*

### 133 **Efficiency**

134 All support persons were adamant that TM saved significant travel time. One reported that TM  
 135 was also cost saving, due to travel cost involved with an in-person assessment. All assessors  
 136 agreed that TM assessments overall required less time, preventing long distance travel to  
 137 assess a patient: *'it allows the process in a timely fashion with an efficient utilization of*  
 138 *physician and patient resources in the sense that it takes the travel away'* (Assessor G). Two  
 139 administrators and one assessor thought that planning for TM took longer than planning for an  
 140 in-person assessment due to the need to find/organize a witness. Several interviewees  
 141 acknowledged that using TM was cost saving from a system's perspective, as the health

1  
2  
3  
4  
5  
6  
7  
8  
9  
10  
11  
12  
13  
14  
15  
16  
17  
18  
19  
20  
21  
22  
23  
24  
25  
26  
27  
28  
29  
30  
31  
32  
33  
34  
35  
36  
37  
38  
39  
40  
41  
42  
43  
44  
45  
46  
47  
48  
49  
50  
51  
52  
53  
54  
55  
56  
57  
58  
59  
60

142 authority did not have to reimburse traveling fees for in-person assessments. Technological  
143 issues rarely impeded the TM consultations, but several assessors mentioned difficulty with  
144 conducting a TM assessment when the patient had to be lying flat in bed: *‘the most important*  
145 *thing, to be honest, is that I can see the patient and sometimes it’s difficult if they’re lying flat or*  
146 *– it’s quite difficult for them to see me, but I’m able to see them’* (Assessor C). Most  
147 interviewees thought that MAiD coordinators were instrumental in providing assistance and  
148 support for TM.

149 **Equity**

150 Several interviewees pointed out that TM allowed equitable access to MAiD eligibility  
151 assessment.

152 **INTERPRETATION**

153 Findings from this research demonstrated that quality of care can be met through the use of  
154 TM for MAiD eligibility assessments for specific situations and patients. We found that the BC  
155 Health Quality Matrix was a useful framework to analyse quality of care in this situation.  
156 Overall, participants expressed satisfaction with this modality; satisfaction was higher for  
157 support persons/patients and administrators than for assessors. Acceptability was very high  
158 amongst support persons and the one patient and this is an essential finding given the  
159 importance of a patient-centered practice. Patient characteristics emerged as the main theme  
160 for appropriateness for all interviewees. The accessibility dimension obtained most unanimity,  
161 participants expressing that TM facilitated access to the assessment and even allowed access



1  
2  
3 162 for some patients. Overall, interviewees agreed that using TM was effective. The patient and  
4  
5  
6 163 the support persons had no concerns about safety; only assessors and administrators voiced  
7  
8 164 concerns and some discussed getting consent. Most interviewees agreed that TM was efficient,  
9  
10  
11 165 however, organizing a witness was reported as a barrier to efficiency. The importance of the  
12  
13 166 MAiD coordinators in providing operational support for the TM consultation was highlighted.  
14  
15  
16 167 Findings from this research are consistent with previous research on TM and abortion (15-17)  
17  
18  
19 168 and TM and palliative care (18-20), showing high acceptability amongst patients with increased  
20  
21 169 efficiency and access to healthcare services when TM was available.  
22  
23  
24  
25 170 The limitations of this study include the small sample, so the opinions of support  
26  
27 171 persons/patients, assessors and administrators who were involved in TM for MAiD eligibility  
28  
29 172 assessments in BC may not be representative. The interview guide developed for this study had  
30  
31  
32 173 not been validated with a wide sample of respondents. The perspective of support  
33  
34  
35 174 persons/patients regarding the witness requirement was not obtained for this research. This  
36  
37 175 research did not include perspectives of First Nations.  
38  
39  
40  
41 176 This study showed that the use of TM for MAiD eligibility assessments remains relatively low in  
42  
43 177 BC. Assessing and promoting the integration of a patient-centered Virtual Health model of  
44  
45 178 service for the MAiD program in BC would be useful in harmonizing TM practices and  
46  
47  
48 179 facilitating access to the service. Clear mechanisms, such as consent forms, and communication  
49  
50 180 between assessors and administrators to implement those mechanisms are recommended to  
51  
52  
53 181 enforce informed consent and protect the patients. Future research should include the First  
54  
55 182 Nations Health Authority, given the remote or rural nature of some First Nations communities.  
56  
57  
58  
59  
60

1  
2  
3 183 We need to know more about how patients and support persons feel about the witness  
4  
5  
6 184 requirement for TM assessments. Another important area of research is specific outcomes  
7  
8 185 related to TM assessments. Methodological challenges with evaluating effectiveness,  
9  
10  
11 186 particularly with quantitative methods, are inherent to the peculiarities of palliative care (17);  
12  
13 187 similar challenges apply to a MAiD setting.

14  
15  
16 188 Conclusions

17  
18  
19  
20 189 This research demonstrated that TM can be used for this type of consultation in a manner that  
21  
22 190 is acceptable and effective for patients and assessors, while overall improving efficiency for the  
23  
24  
25 191 program. TM is an important tool that has potential to expand access to MAiD; this is of  
26  
27 192 particular relevance given BC's geographic context, assessor shortage and limited physical  
28  
29  
30 193 capacities for patients to travel. A careful consideration of the risks and benefits of a MAiD  
31  
32 194 eligibility assessment via TM, on a case-by-case basis, is recommended to promote quality of  
33  
34 195 care; specific considerations where highlighted in this research.

35  
36  
37  
38 196 References

39  
40  
41 197 1. Government of Canada [Internet]. Fourth Interim Report on Medical Assistance in Dying in  
42 198 Canada; 2019 [cited 2019 May 2]. Available from: [https://www.canada.ca/en/health-](https://www.canada.ca/en/health-canada/services/publications/health-system-services/medical-assistance-dying-interim-report-april-2019.html)  
43 199 [canada/services/publications/health-system-services/medical-assistance-dying-interim-report-](https://www.canada.ca/en/health-canada/services/publications/health-system-services/medical-assistance-dying-interim-report-april-2019.html)  
44 200 [april-2019.html](https://www.canada.ca/en/health-canada/services/publications/health-system-services/medical-assistance-dying-interim-report-april-2019.html)  
45 201  
46 202 2. Robertson WD, Pewarchuk J, Reggler J, Green S, Daws T, Trouton K. Case Review of Medically  
47 203 Assisted Deaths on Vancouver Island. BC Med J. 2017  
48 204  
49 205 3. Schiller CJ. Medical Assistance in Dying in Canada: Focus on Rural Communities. J Nurse Pract.  
50 206 2017;13:626-634.  
51 207  
52 208 4. Robertson WD, Beuthin R. A Review of Medical Assistance in Dying on Vancouver Island July  
53 209 2016-July 2018. Available from: [https://www.islandhealth.ca/sites/default/files/2018-10/MAiD-](https://www.islandhealth.ca/sites/default/files/2018-10/MAiD-Report-2016-2018.pdf)  
54 210 [Report-2016-2018.pdf](https://www.islandhealth.ca/sites/default/files/2018-10/MAiD-Report-2016-2018.pdf)  
55  
56  
57  
58  
59  
60

5. Bill C14 An Act to Amend the Criminal Code (Medical Assistance in Dying)  
<https://lop.parl.ca/staticfiles/PublicWebsite/Home/ResearchPublications/LegislativeSummaries/PDF/42-1/c14-e.pdf>
6. British Columbia [Internet]. Medical Assistance in Dying Travel and Training Assistance Program; [cited 2019 Apr 16]. Available from: <https://www2.gov.bc.ca/gov/content/health/practitioner-professional-resources/physician-compensation/rural-practice-programs/medical-assistance-in-dying-travel-and-training-assistance-program>
7. College of Physicians and Surgeons of British Columbia. Practice Standards. Medical Assistance in Dying [Internet]; 2019 [cited 2019 Feb 21]. Available from: <https://www.cpsbc.ca/files/pdf/PSG-Medical-Assistance-in-Dying.pdf>
8. [Terekhova E, Tabassi HR, Gabriel PJafari S.](#) TELEMEDICINE IN PRIMARY CARE: WHO ARE THE CURRENT USERS IN BRITISH COLUMBIA? *BC Med J* 2017;59(5):264-268
9. Chen J, Jin W, Zhang XX, et al. Telerehabilitation approaches for stroke patients: Systematic review and meta-analysis of randomized controlled trials. *J Stroke Cerebrovasc Dis* 2015;24:2660-2668.
10. Rasmussen OW, Lauszus FF, Loekke M. Telemedicine compared with standard care in type 2 diabetes mellitus: A randomized trial in an outpatient clinic. *J Telemed Telecare* 2016;22:363-368.
11. BC Patient Safety & Quality Council. BC Health Quality Matrix; 2017 [cited 2019 Feb 21]. Available from: <https://staging.bcpsqc.ca/resource/bc-health-quality-matrix/>
12. Dedoose. Available from: <https://www.dedoose.com/>
13. DePoy E, Gitlin LN. Introduction to Research - Understanding and applying multiple strategies. Elsevier Mosby, St. Louis; 2011.
14. [BC Patient Safety & Quality Council. Our Vision and Values.](#) [cited 2019 Feb 21]. Available from: <https://bcpsqc.ca/about-the-council/our-vision-and-values/>
15. Fok WK, Mark A. Abortion through telemedicine. *Curr Opin Obstet Gynecol*. 2018 Dec;30(6):394-399.
16. Grindlay K, Lane K, Grossman D. Women's and providers' experiences with medical abortion provided through telemedicine: a qualitative study. *Womens Health Issues* 2013; 23:e117–e122.
17. Hyland P, Raymond EG, Chong E. A direct-to-patient telemedicine abortion service in Australia: retrospective analysis of the first 18 months. *Aust N Z J Obstet Gynaecol* 2018; 58:335–340.
18. Rogante M, Giacomozzi C, Griogioni M, Kairy D. Telemedicine in palliative care: a review of systematic reviews. [Ann Ist Super Sanita](#). 2016 Jul-Sep;52(3):434-442.

1  
2  
3  
4  
5  
6  
7  
8  
9  
10  
11  
12  
13  
14  
15  
16  
17  
18  
19  
20  
21  
22  
23  
24  
25  
26  
27  
28  
29  
30  
31  
32  
33  
34  
35  
36  
37  
38  
39  
40  
41  
42  
43  
44  
45  
46  
47  
48  
49  
50  
51  
52  
53  
54  
55  
56  
57  
58  
59  
60

259 19. Oliver DP, Demiris G, Wittenberg-Lyles E, Washington K, Day T, Novak H. A systematic review of  
260 the evidence base for telehospice. *Telemed J E Health* 2012;18(1):38- 47. DOI:  
261 10.1089/tmj.2011.0061 24.  
262  
263 20. Capurro D, Ganzinger M, Perez-Lu J, Knaup P. Effectiveness of eHealth interventions and  
264 information needs in palliative care: a systematic literature review. *J Med Internet Res*  
265 2014;16(3):e72. DOI: 10.2196/jmir.2812  
266

267  
  
  
268  
269

Confidential

Table 1 - The BC Health Quality Matrix (10)

| Quality Dimensions | Definitions                                                                                                                                                                                                                                                                                                                                                                                                                                                                                      |
|--------------------|--------------------------------------------------------------------------------------------------------------------------------------------------------------------------------------------------------------------------------------------------------------------------------------------------------------------------------------------------------------------------------------------------------------------------------------------------------------------------------------------------|
| Acceptability      | Care that is respectful of patient and family preferences, needs and values. This dimension takes into consideration patient and family preferences, such as respecting cultural values and encouraging family involvement in decision making. Acceptability includes health care providers being empathetic to patients and families, following the wishes and expectations of patients and families and empowering them to be active in their own care                                         |
| Appropriateness    | Care provided is evidence based and specific to individual clinical needs. This dimension reflects care that is grounded in best practices and is provided to optimize an individual's health outcome. Appropriate care weighs the benefits and risks of care – aiming to provide maximum benefit (supporting best outcomes).                                                                                                                                                                    |
| Accessibility      | Ease with which health services are reached. Accessibility is the extent to which individuals can easily obtain the care when and where they need. Accessibility aims to ensure there are not physical, financial or psychological barriers to receiving information, care and treatment.                                                                                                                                                                                                        |
| Safety             | Avoiding harm resulting from care. Safety is the extent to which health care services do not harm patients. Safety involves designing and implementing processes to prevent and minimize those adverse outcomes or injuries that could unintentionally result from the delivery of care.                                                                                                                                                                                                         |
| Effectiveness      | Care that is known to achieve intended outcomes. Effectiveness is care that achieves the best possible outcomes for patients by developing and carrying out care plans that are based on clinical evidence and best practices. A commitment to effectiveness is demonstrated by continuously studying the results of care to find ways to improve care for all patients.                                                                                                                         |
| Equity             | Distribution of health care and its benefits fairly according to population need. Equity defines the extent to which BC's health system allocates health services fairly across the province's population. Equity does not mean the same health care for everyone because British Columbians have different needs. Equity is demonstrated when British Columbians have equal access to the health services they need, regardless of gender, ethnicity, socioeconomic status, or where they live. |
| Efficiency         | Optimal use of resources to yield maximum benefits and results. Efficiency is about delivering services to improve the health of more British Columbians by maximizing capacity and eliminating/avoiding waste in the health system. Health care services are considered in light of value for money or providing the maximum amount of positive impact on the health of British Columbians.                                                                                                     |

Table 2 – Proportion of TM eligibility assessments for 3 BC Health Authorities (as of April 2019)

| Health Authority | Number of MAiD eligibility assessment for MAiD | Total number of MAiD requests            | Proportion TM |
|------------------|------------------------------------------------|------------------------------------------|---------------|
| 1                | 2                                              | 621                                      | 0.32%         |
| 2                | 51                                             | 901                                      | 5.7%          |
| 3                | 52                                             | n/a<br>(839 MAiD deaths for this period) | n/a<br>(6.2%) |

Table 3 - Support Persons/Patients Profiles<sup>1</sup>

| Support Person/Patient | Age     | Sex | Health Authority | Diagnosis                                       |
|------------------------|---------|-----|------------------|-------------------------------------------------|
| A                      | n/a     | F   | Out of province  | Conversion Disorder                             |
| B                      | [71-80] | M   | Urban            | Parkinson                                       |
| C                      | [61-70] | F   | Rural            | Cancer                                          |
| D                      | [61-70] | F   | Urban            | n/a                                             |
| E                      | [61-70] | F   | Urban            | Pulmonary Fibrosis                              |
| F                      | [41-50] | F   | Rural            | Cancer                                          |
| G                      | [71-80] | M   | Urban            | Multiple Sclerosis                              |
| H                      | [61-70] | M   | Rural            | Borderline personality disorder, chronic asthma |

Table 4 - MAiD Assessors Profiles <sup>1</sup>

| Assessor | Age Group | Sex | Health Authority | # of MAiD eligibility assessment performed with TM |
|----------|-----------|-----|------------------|----------------------------------------------------|
| A        | [61-70]   | F   | Urban            | 5                                                  |
| B        | [21-30]   | M   | Urban            | 3                                                  |
| C        | [51-60]   | M   | Rural            | ~10                                                |
| D        | [41-50]   | F   | Urban            | ~6                                                 |
| E        | [41-50]   | F   | Rural            | 5                                                  |
| F        | [51-60]   | F   | Urban            | 10 to 15                                           |
| G        | [61-70]   | M   | Rural            | 4 or 5                                             |
| E        | [31-40]   | F   | Urban            | 1                                                  |

<sup>1</sup> Ages are displayed by group and locations are identified by urban or rural to protect participant’s confidentiality.

Table 5 - Administrators Profiles<sup>2</sup>

| MAiD Care                 |         |     |
|---------------------------|---------|-----|
| Coordinator/Administrator | Age     | Sex |
| A                         | [41-50] | F   |
| B                         | [51-60] | F   |
| C                         | [41-50] | F   |
| D                         | [31-40] | F   |
| E                         | n/a     | M   |

Table 6 - Telemedicine Experience, Perception and Satisfaction

| Support Persons/Patients | Computer Experience (1-5) | Internet Experience (1-5) | TM experience (1-5) | Perception TM pre use for MAiD | Level of satisfaction with TM (1-5) |
|--------------------------|---------------------------|---------------------------|---------------------|--------------------------------|-------------------------------------|
| A                        | n/a                       | n/a                       | n/a                 | n/a                            | 5                                   |
| B                        | 1 3/4                     | 2                         | 1                   | n/a                            | 5                                   |
| C                        | 5                         | 5                         | 1                   | n/a                            | 5                                   |
| D                        | 3                         | 3                         | 1                   | Neutral                        | 5                                   |
| E                        | 3                         | 3                         | 3                   | Great                          | 4                                   |
| F                        | 5                         | 5                         | 5                   | High                           | 5                                   |
| G                        | 4.5                       | 4.5                       | 1                   | Neutral                        | 5                                   |
| H                        | 2.5                       | 3                         | 1                   | Never heard of it              | 5                                   |

  

| Assessors |   |     |     |             |     |
|-----------|---|-----|-----|-------------|-----|
| A         | 4 | 5   | 2   | Negative    | 1   |
| B         | 4 | 4.5 | 3   | Good        | 4   |
| C         | 4 | 4   | 3   | Neutral     | 4   |
| D         | 4 | 4   | 3.8 | Neutral     | 4.5 |
| E         | 3 | 4   | 2   | Positive    | 3   |
| F         | 5 | 5   | 3   | Very useful | 3   |
| G         | 4 | 4   | 3   | n/a         | 4   |
| E         | 4 | 4   | 3   | Neutral     | 5   |

  

| Administrators |   |   |      |                      |     |
|----------------|---|---|------|----------------------|-----|
| A              | 4 | 5 | 4.5  | Good                 | 4   |
| B              | 5 | 5 | 3.75 | Great for telehealth | 4.5 |
| C              | 5 | 5 | 2    | Great                | 4   |

<sup>2</sup> Ages are displayed by group and locations were not provided to protect participant's confidentiality

|   |     |     |     |           |     |
|---|-----|-----|-----|-----------|-----|
| D | 4   | 4   | 5   | Useful    | 5   |
| E | n/a | n/a | n/a | Supported | n/a |

Table 7 – Device, Software and Location

| Assessors                | Device                      | Software                    | Location TM        |
|--------------------------|-----------------------------|-----------------------------|--------------------|
| A                        | iphone                      | Facetime                    | Home               |
| B                        | iphone                      | Facetime                    | Home or Hospital   |
| C                        | iphone                      | Facetime                    | Home               |
| D                        | Laptop, telehealth, phone   | Mainly Skype                | Home               |
| E                        | Computer, phone, telehealth | Telehealth, Facetime, Skype | Home or Telehealth |
| F                        | Various                     | Various                     | Home or Telehealth |
| G                        | Telehealth                  | Telehealth                  | Telehealth         |
| E                        | iphone                      | Facetime                    | Home               |
| Support Persons/Patients |                             |                             |                    |
| A                        | computer                    | Skype or Facetime           | Home               |
| B                        | ipad                        | Facetime                    | Home               |
| C                        | computer                    | Facetime                    | Home               |
| D                        | iphone                      | Facetime or Skype           | Home               |
| E                        | ipad                        | Skype                       | Home               |
| F                        | iphone                      | Facetime                    | Home               |
| G                        | Computer                    | Skype                       | Home               |
| E                        | Computer                    | Skype                       | Home               |
